# Supplementary material for: Revealing the correlation between structural evolution and Li+diffusion kinetics of nickel-rich cathode materials in Li-ion batteries
Source: Royal Society of Chemistry journal article supplement (doi:10.1039/d0ta00555j), 2020-01-01
Supplement: d0ta00555j1.pdf [file d0ta00555j1.pdf]

## Supporting Information

### Revealing the correlation between structural evolution and Li<sup>+</sup> diffusion kinetics of Nickel-rich cathode materials in Li- ion batteries

Chaoyu Hong<sup>†a</sup>, Qianyi Leng<sup>†a</sup>, Jianping Zhu<sup>a</sup>, Shiyao Zheng<sup>b</sup>, Huajin He<sup>a</sup>, Yixiao Li<sup>a</sup>,  
Rui Liu<sup>ac</sup>, Jiajia Wan<sup>a</sup>, Yong Yang<sup>\*a</sup>

Table S1. The ratio of TM in NCM811 measured by ICP-OES

| Sample | Measured Atomic Ratio |       |       |
|--------|-----------------------|-------|-------|
|        | Ni                    | Co    | Mn    |
| NCM811 | 0.8                   | 0.102 | 0.104 |

Table S2. Cell parameter of NCM811 and the deviation

|        | <i>a</i> (Å) | <i>c</i> (Å) | <i>V</i> (Å <sup>3</sup> ) | Li/Ni<br>mixing | R <sub>wp</sub> |
|--------|--------------|--------------|----------------------------|-----------------|-----------------|
| NCM811 | 2.8724(9)    | 14.2001(2)   | 101.470(1)                 | 1.53%           | 2.92%           |

Table S3. Specific capacity and CE of the first three cycles under different rates. 1 C=  
200 mA·g<sup>-1</sup>

(CC= Charge Capacity, DC= Discharge Capacity, CE= Coulombic Efficiency)

|     |                           | 0.05C | 0.1C | 0.5C | 1C   | 5C   | 10C  |
|-----|---------------------------|-------|------|------|------|------|------|
| 1st | CC (mAh·g <sup>-1</sup> ) | 257   | 254  | 247  | 243  | 233  | 227  |
|     | DC (mAh·g <sup>-1</sup> ) | 230   | 226  | 213  | 208  | 190  | 177  |
|     | CE (%)                    | 89.5  | 88.8 | 86.3 | 85.5 | 81.4 | 77.8 |
| 2nd | CC (mAh·g <sup>-1</sup> ) | 231   | 225  | 213  | 2208 | 188  | 179  |
|     | DC (mAh·g <sup>-1</sup> ) | 224   | 220  | 209  | 206  | 185  | 177  |
|     | CE (%)                    | 97.2  | 98.0 | 97.9 | 98.7 | 98.5 | 99   |

|     |                           |      |      |      |      |      |      |
|-----|---------------------------|------|------|------|------|------|------|
|     | CC (mAh·g <sup>-1</sup> ) | 225  | 220  | 208  | 206  | 185  | 178  |
| 3rd | DC (mAh·g <sup>-1</sup> ) | 220  | 216  | 204  | 203  | 182  | 175  |
|     | CE (%)                    | 97.5 | 98.4 | 98.3 | 98.9 | 98.6 | 98.1 |

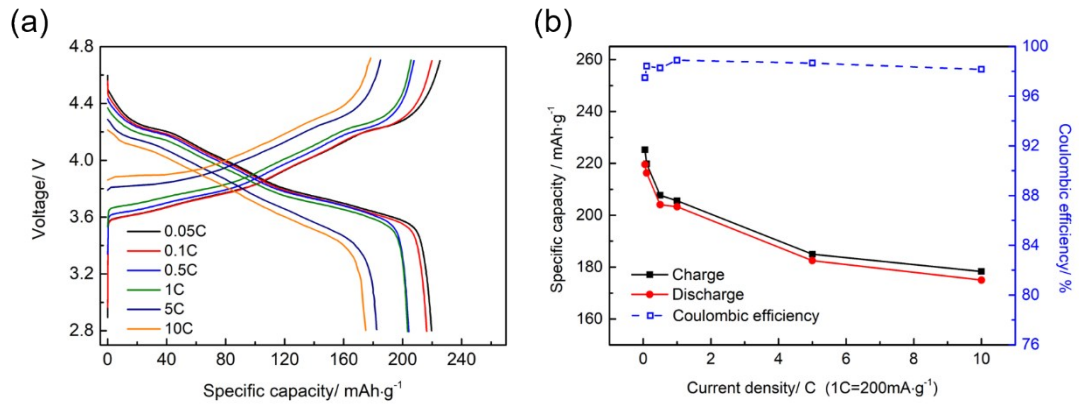

Figure S1. The third (a) Charge-discharge curves, and (b) corresponding capacity and CE at different rates.

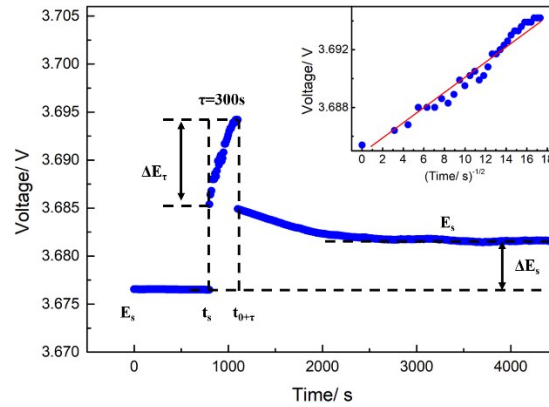

Figure S2. GITT schematic of single pulse. The embedded thumbnail is the relation curve between  $E$  and  $\tau^{1/2}$ .

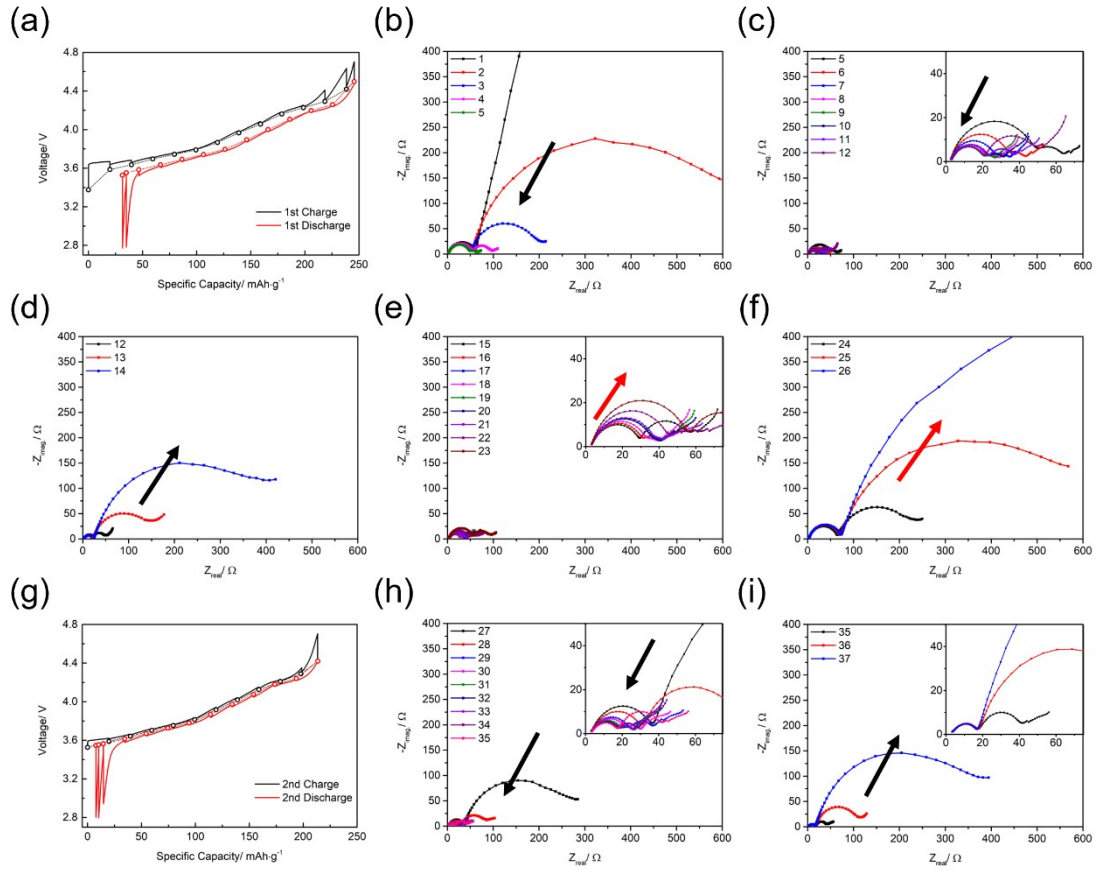

Figure S3. Nyquist diagram of charge/discharge process of NCM811, divided by the characteristic of the curves, C represents Charge, D represents discharge. (b)1C-I, (c) 1C-II, (d) 1C-III, (e) 1D-I and 1D-II, (f) 1D-III, (h) 2C-I and 2C-II, (i) 2C-III. The inserted picture is magnified image of the medium-frequency. The arrow represents the variation trend of the Nyquist semicircle; (a) and (g) are the electrochemical curves of the first two cycles. The hollow circles are collected points.

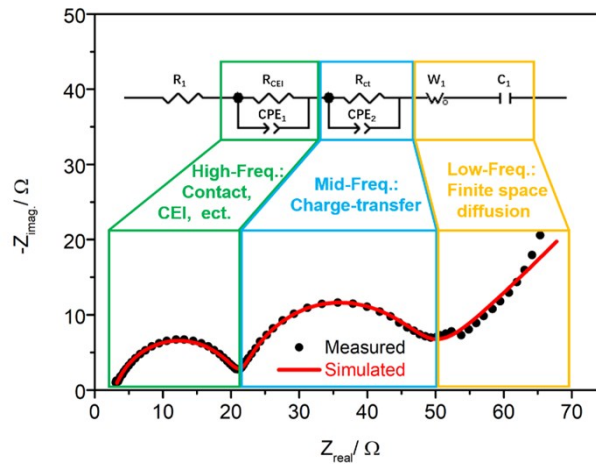

Figure S4. EIS result and the corresponding equivalent circuit.

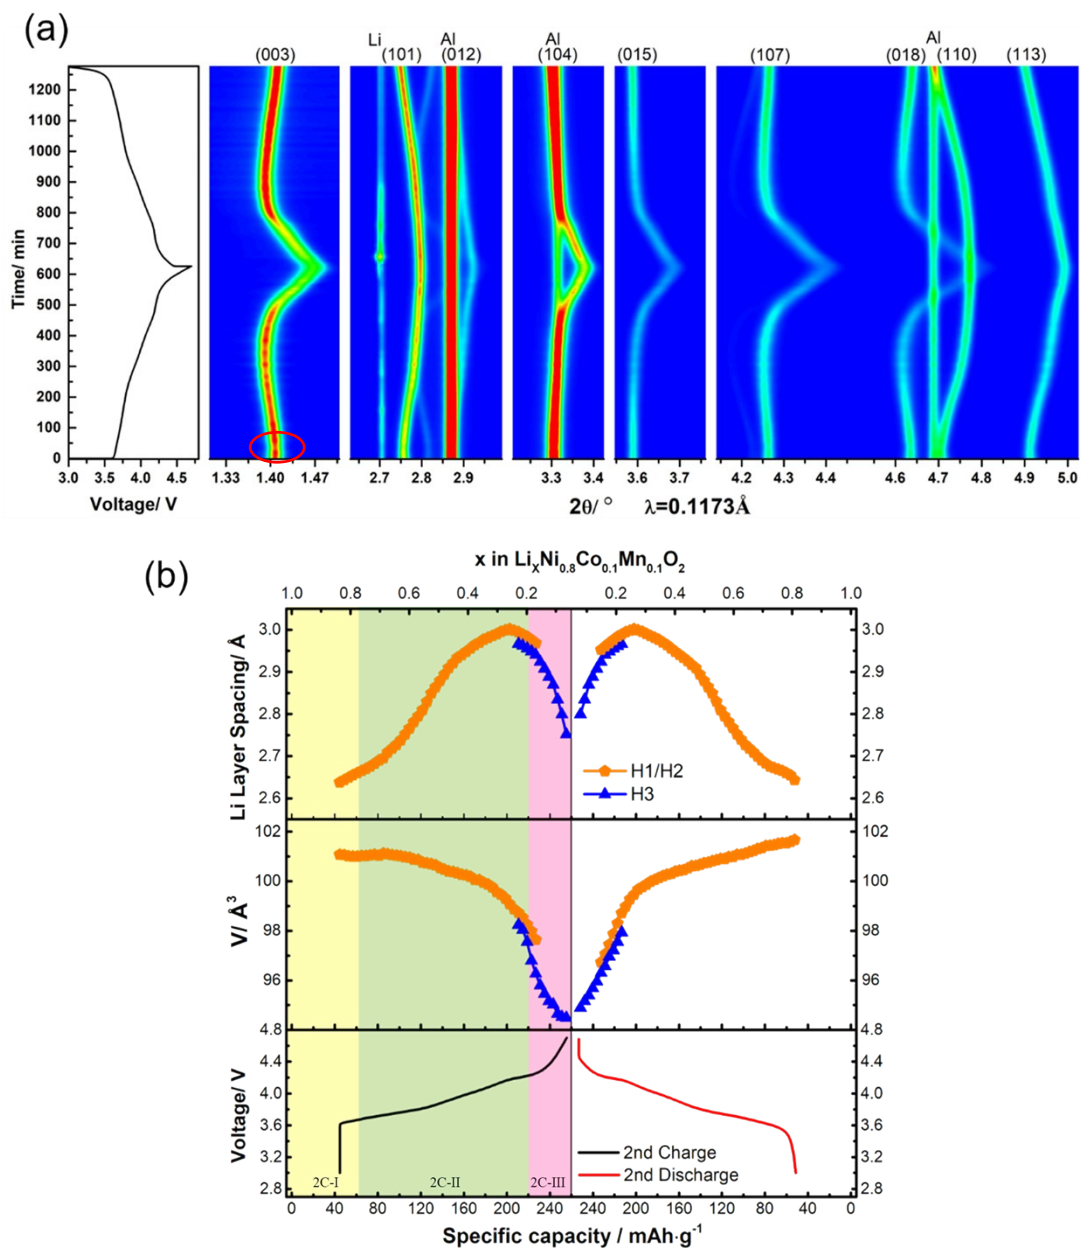

Figure S5. (a) In operando synchrotron XRD Contour plot and (b) thickness of the lithium layer and unit cell volume  $V$  obtained by Rietveld refinement for the second cycle of NCM811.

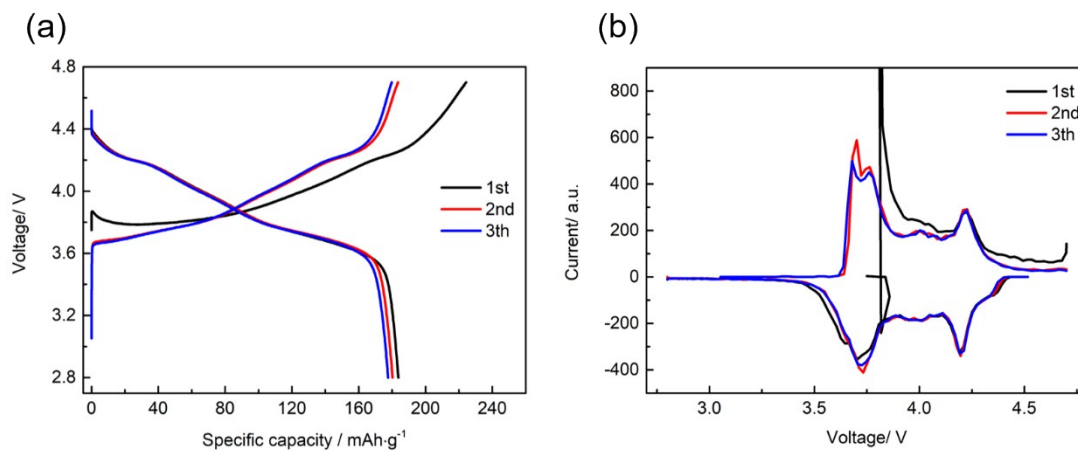

Figure S6. (a) Charge-discharge curves and (b) corresponding  $dQ/dV$  curves of NCM811 during the first three cycles at 0°C.
